# Supplementary material for: Dysregulation of pseudogene/lncRNA-hsa-miR-363-3p-SPOCK2 pathway fuels stage progression of ovarian cancer
Source: publisher site journal article supplement (doi:10.18632/aging.102538), 2019-12-03
Supplement: Supplementary file [file aging-v11i23-102538-supplementary-material-SD4.pdf]

**Supplementary Table 4. The co-expressed genes of SPOCK2 commonly appeared in UALCAN and GEPIA databases.**

---

| <b>Co-expressed genes</b> |
|---------------------------|
| RASGRP4                   |
| SLC48A1                   |
| ADORA1                    |
| UNC5B                     |
| OXTR                      |
| CRB2                      |
| TRIM36                    |
| CADM3                     |
| SLC22A18AS                |
| ZBED2                     |
| TNS3                      |
| KIF21A                    |
| S100A10                   |
| CLIC5                     |
| CAMK2G                    |
| RAB19                     |
| CACNG4                    |
| TBC1D2                    |
| UPK3B                     |
| MYADM                     |
| ANXA7                     |
| CLDN15                    |
| WNT10A                    |
| CCDC85A                   |
| CD151                     |
| CASKIN2                   |
| AMOTL2                    |
| DTX4                      |
| IGFBP6                    |
| ANXA2P2                   |
| ST6GAL2                   |
| ANXA2                     |
| KRT80                     |
| CLSTN2                    |
| ANXA9                     |
| DNM3                      |
| SHISA4                    |
| PLA2G7                    |
| INF2                      |
| CHRDL1                    |
| RAPGEF3                   |
| SLC4A11                   |
| PNPLA2                    |
| RNASEL                    |

---

TPRN  
OLFML2A  
TGM1  
VSIG10L  
SERPINB5  
LRRN4  
FNDC4  
PRSS33  
ST5  
GNG12  
VSTM2L  
TNNT2  
BAIAP2  
ARL13B  
SERPINA5  
ZMIZ1  
CHST11  
SLC29A3  
ANO9  
PKP3  
VCL  
ARNTL  
BET1L  
TMEM9B  
GDPD5  
SCD5  
FAM69A  
TNS1  
ARPC1B  
SMPD1  
PXN  
RHOF  
RIC8A

---

**Supplementary Table 5. The potential upstream lncRNAs of hsa-miR-363-3p predicted by starBase and miRNet databases.**

| <b>lncRNAs predicted by starBase</b> | <b>lncRNAs predicted by miRNet</b> |
|--------------------------------------|------------------------------------|
| LINC01128                            | NEFL                               |
| MDS2                                 | XIST                               |
| AC239868.3                           | SCAMP1                             |
| AL358472.2                           | MALAT1                             |
| LINC00467                            | SNHG5                              |
| C1orf143                             | OIP5-AS1                           |
| AC074117.1                           | RNU4ATAC                           |
| AC016700.3                           | DAPK1-IT1                          |
| PAX8-AS1                             | AC005307.3                         |
| AC018470.1                           | AC005943.5                         |
| AC016708.1                           | AC007228.9                         |
| AC105760.2                           | AC034220.3                         |
| WWTR1-IT1                            | AC074117.10                        |
| AC104472.1                           | AC093627.10                        |
| AC007620.3                           | LINC00657                          |
| CTBP1-AS2                            | PITPNA-AS1                         |
| AC097376.2                           | RP1-506.6                          |
| AC104793.1                           | RP11-206L10.11                     |
| PURPL                                | RP11-234O6.2                       |
| NR2F1-AS1                            | RP11-449D8.1                       |
| MIR3936HG                            | RP11-46C20.1                       |
| SNHG4                                | RP11-473I1.10                      |
| AL049555.1                           | RP11-492E3.1                       |
| SNHG5                                | RP11-65F13.2                       |
| AL513550.1                           | RP11-815I9.4                       |
| AL022069.1                           | RP11-98I9.4                        |
| AC093627.4                           | RP3-341D10.4                       |
| AC011294.1                           | RP3-368A4.6                        |
| FEZF1-AS1                            | RP3-508I15.9                       |
| WEE2-AS1                             | RP3-523K23.2                       |
| AC021242.3                           | RP4-714D9.5                        |
| AF131215.6                           | SNHG14                             |
| AC124067.4                           | TBX5-AS1                           |
| AC084082.1                           |                                    |
| AL354707.1                           |                                    |
| DAPK1-IT1                            |                                    |
| LINC00963                            |                                    |
| AL117339.4                           |                                    |
| LINC00858                            |                                    |
| KCNQ1OT1                             |                                    |
| MALAT1                               |                                    |
| AP000577.1                           |                                    |
| AP001541.1                           |                                    |
| TBX5-AS1                             |                                    |

HNF1A-AS1  
AC131212.3  
LINC00365  
INTS6-AS1  
AC005519.1  
AL136040.1  
LINC02321  
LINC01550  
MEG8  
PWAR5  
SNHG14  
ARHGAP11B  
OIP5-AS1  
PLA2G4E-AS1  
AC090510.3  
GABPB1-IT1  
GABPB1-AS1  
AC055855.1  
AC015712.2  
AC130650.2  
PITPNA-AS1  
AC026271.3  
CCDC144NL-AS1  
AC111170.3  
AC087741.1  
LINC01915  
AC011825.4  
AC018445.3  
AC011447.7  
AC005394.2  
AC008555.8  
AC012617.1  
AC022150.4  
AC007228.2  
AC012313.1  
NORAD  
SNHG17  
DUXAP8  
AP000553.1  
AL022322.1  
AL021707.2  
NDUFA6-AS1  
LINC01560  
XIST  
JPX  
Z83843.1

---
